# Supplementary material
Source: publisher figshare collection journal article supplement (https://karger.figshare.com/ndownloader/files/22809773)
Supplement: Supplementary file 1 [file 22809773]

| Study | Selection | | | | Comparability of cohorts | Outcome | | |
| --- | --- | --- | --- | --- | --- | --- | --- | --- |
|  | Representativeness of exposed cohort | Selection of nonexposed cohort | Ascertainment of exposure | Outcome not present at baseline | Assessment of outcome | Sufficient follow- up duration | Adequate follow up |
| Mavromatis et al (5) | ★ | ★ | ★ | ★ | 18 out of 25 | ★ | ★ | NR |
| Hutter et al (6) | ★ | ★ | ★ | ★ | 8 out of 18 | ★ | ★ | ★ |
| Barbanti et al (7) | ★ | ★ | ★ | ★ | 2 out of 20 | ★ | ★ | ★ |
| Cortes et al (8) | ★ | ★ | ★ | ★ | 20 out of 33 | ★ | No | ★ |
| D'Onofrio et al | ★ | ★ | ★ | ★ | 10 out of 25 | ★ | ★ | ★ |
| Khawaja et al | ★ | ★ | ★ | ★ | 5 out of 16 | ★ | ★ | NR |
| Kindya et al | ★ | ★ | ★ | ★ | 6 out of 16 | ★ | ★ | NR |
| Kiramijyan et al | ★ | ★ | ★ | ★ | 10 out of 42 | ★ | ★ | NR |
| Toggweiler et al | ★ | ★ | ★ | ★ | 9 out of 19 | ★ | ★ | ★ |
| Vollenbroich et al | ★ | ★ | ★ | ★ | 9 out of 20 | ★ | ★ | NR |
| Bedogni et al | ★ | ★ | ★ | ★ | 7 out of 24 | ★ | ★ | ★ |
| Costantino et al | ★ | ★ | ★ | ★ | 12 out of 22 | ★ | ★ | ★ |
| Haensig et al | ★ | ★ | ★ | ★ | 6 out of 21 | ★ | ★ | NR |
| Baumgartner H & Schymik et al | ★ | ★ | ★ | ★ | 9 out of 10 | ★ | ★ | ★ |
| Dijk et al | ★ | ★ | ★ | ★ | 12 out of 28 | ★ | ★ | No |
| Silberman et al | ★ | ★ | ★ | ★ | 3 out of 17 | ★ | ★ | ★ |
| Ruck et al | ★ | ★ | ★ | ★ | 2 out of 4 | ★ | ★ | ★ |

Table S1 – Quality assessment. Study cohorts were not considered comparable if there were one or more unbalanced characteristics. > 90% follow up = ★. Sufficent follow up > 1 year considered adequate.


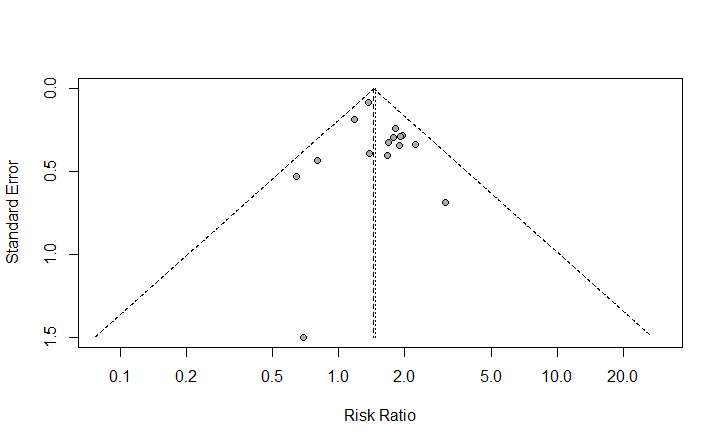


Figure S1 - Funnel plot for short term mortality


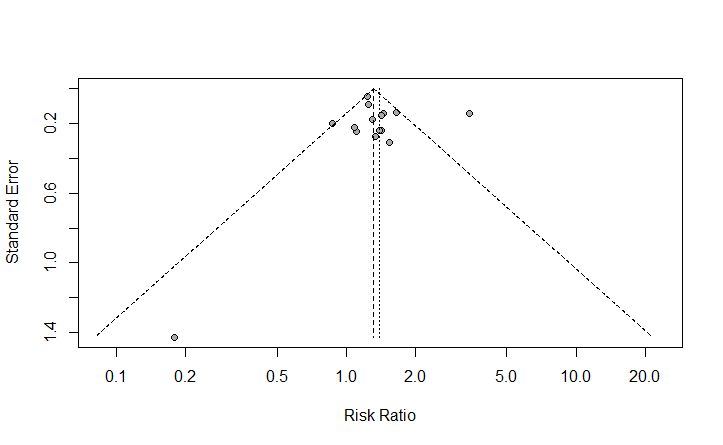


Figure S2 - Funnel plot for long term mortality

References –

1. D'Onofrio A, Gasparetto V, Napodano M, Bianco R, Tarantini G, Renier V, Isabella G, Gerosa G. Impact of preoperative mitral valve regurgitation on outcomes after transcatheter aortic valve implantation. Eur J Cardiothorac Surg. 2012;41(6):1271-6.
2. Khawaja MZ, Williams R, Hung J, Arri S, Asrress KN, Bolter K, Wilson K, Young CP, Bapat V, Hancock J, Thomas M, Redwood S.Impact of preprocedural mitral regurgitation upon mortality after transcatheter aortic valve implantation (TAVI) for severe aortic stenosis. Heart. 2014;100(22):1799-803.
3. Kiramijyan S, Magalhaes MA, Koifman E, Didier R, Escarcega RO, Minha S, Baker NC, Negi SI, Torguson R, Gai J, Okubagzi P, Asch FM, Gaglia MA Jr, Ben-Dor I, Satler LF, Pichard AD, Waksman R.Impact of baseline mitral regurgitation on short- and long-term outcomes following transcatheter aortic valve replacement. Am Heart J. 2016;178:19-27.
4. Toggweiler S, Boone RH, Rodés-Cabau J, Humphries KH, Lee M, Nombela-Franco L, Bagur R, Willson AB, Binder RK, Gurvitch R, Grewal J, Moss R, Munt B, Thompson CR, Freeman M, Ye J, Cheung A, Dumont E, Wood DA, Webb JG.Transcatheter aortic valve replacement: outcomes of patients with moderate or severe mitral regurgitation.J Am Coll Cardiol. 2012;59(23):2068-74.
5. Bedogni F, Latib A, De Marco F, Agnifili M, Oreglia J, Pizzocri S, Latini RA, Lanotte S, Petronio AS, De Carlo M, Ettori F, Fiorina C, Poli A, Cirri S, De Servi S, Ramondo A, Tarantini G, Marzocchi A, Fiorilli R, Klugmann S, Ussia GP, Tamburino C, Maisano F, Brambilla N, Colombo A, Testa L.Circulation. 2013;128(19):2145-53.
6. Barbanti M, Petronio AS, Ettori F, Latib A, Bedogni F, De Marco F, Poli A, Boschetti C, De Carlo M, Fiorina C, Colombo A, Brambilla N, Bruschi G, Martina P, Pandolfi C, Giannini C, Curello S, Sgroi C, Gulino S, Patanè M, Ohno Y, Tamburino C, Attizzani GF, Immè S, Gentili A, Tamburino C.5-Year Outcomes After Transcatheter Aortic Valve Implantation With CoreValve Prosthesis.JACC Cardiovasc Interv. 2015;8(8):1084-1091.
7. Costantino MF, Dores E, Innelli P, Matera A, Santillo V, Violini R, Fiorilli R, Cappabianca G, Marraudino N, Picano E, Tarsia G. The beneficial effects of TAVI in mitral insufficiency.Cardiovasc Ultrasound. 2015;13:49.
8. Haensig M, Holzhey DM, Borger MA, Linke A, Seeburger J, Lehmann S, Schuler G, Mohr FW.Improved mitral valve performance after transapical aortic valve implantation. Ann Thorac Surg. 2014;97(4):1247-53.
9. Baumgartner H. One year outcomes after TAVI in patients with severe aortic stenosis and moderate or severe mitral regurgitation.Abstracts of EuroPCR & AsiaPCR/SingLIVE 2013.Interventions for structural heart disease – Tuesday May 21, 2013.
10. Schymik G, Lefèvre T, Bartorelli AL, Rubino P, Treede H, Walther T, Baumgartner H, Windecker S, Wendler O, Urban P, Mandinov L, Thomas M, Vahanian A.European experience with the second-generation Edwards SAPIEN XT transcatheter heart valve in patients with severe aortic stenosis: 1-year outcomes from the SOURCE XT Registry. JACC Cardiovasc Interv. 2015;8(5):657-69.
11. Boerlage-van Dijk K, Wiegerinck EM, Takama T, Koch KT, Vis MM, de Mol BA, Piek JJ, Bouma BJ, Baan J Jr.Mitral regurgitation prior to transcatheter aortic valve implantation influences survival but not symptoms.Int J Cardiol. 2016;204:95-100.
12. Silberman S, Fink D, Butnaru A, Balkin J, Almagor Y, Tauber R, Merin O. Untreated Mitral Regurgitation Does Not Affect Survival of Elderly Patients Undergoing TAVI.J Heart Valve Dis. 2016;25(1):46-50.
13. Rück A, Settergren M, Yamasak I K.TCT-108 baseline mitral regurgitation does not affect 30 day to two year mortality after transcatheter aortic-valve implantation (TAVI). A report on 576 patients from the Swedish TAVI Registry.J Am Coll Cardiol, 62 (2013), p. B35.
14. Zahn R, Werner N, Gerckens U, Linke A, Sievert H, Kahlert P, Hambrecht R, Sack S, Abdel-Wahab M, Hoffmann E, Zeymer U, Schneider S; German Transcatheter Aortic Valve Interventions—Registry investigators.Five-year follow-up after transcatheter aortic valve implantation for symptomatic aortic stenosis.Heart. 2017;103(24):1970-1976.
15. Eric Van Belle, Francis Juthier, André Vincentelli, Bernard Lung,Helene Eltchaninoff, Marc Laskar, Jean Fajadet, Alain Leguerrier,Martine Gilard, Carlo Banfi, Pascal Leprince, Alain Prat, Emmanuel Teiger. TCT-92 -Does mitral regurgitation impact the outcome of TAVI procedures? Insightsfrom the FRANCE2 Registry.JACC Vol 60/17/Suppl B. October 22–26, 2012.
16. Yoon SH, Ahn JM, Hayashida K, Watanabe Y, Shirai S, Kao HL, Yin WH, Lee MK, Tay E, Araki M, Yamanaka F, Arai T, Lin MS, Park JB, Park DW, Kang SJ, Lee SW, Kim YH, Lee CW, Park SW, Muramatsu T, Hanyu M, Kozuma K, Kim HS, Saito S, Park SJ; Asian TAVR Investigators. Clinical Outcomes Following Transcatheter Aortic Valve Replacement in Asian Population. JACC Cardiovasc Interv. 2016;9(9):926-33.
17. Wendler O, Schymik G, Treede H, Baumgartner H, Dumonteil N, Neumann FJ, Tarantini G, Zamorano JL, Vahanian A.SOURCE 3: 1-year outcomes post-transcatheter aortic valve implantation using the latest generation of the balloon-expandable transcatheter heart valve.Eur Heart J. 2017;38(36):2717-2726.
18. Gilard M, Schlüter M, Snow TM, Dall'Ara G, Eltchaninoff H, Moat N, Goicolea J, Ussia GP, Kala P, Wenaweser P, Zembala M, Nickenig G, Price S, Alegria Barrero E, Iung B, Zamorano P, Schuler G, Corti R, Alfieri O, Prendergast B, Ludman P, Windecker S, Sabate M, Witkowski A, Danenberg H, Schroeder E, Romeo F, Macaya C, Derumeaux G, Laroche C, Pighi M, Serdoz R, Di Mario C. The 2011-2012 pilot European Society of Cardiology Sentinel Registry of Transcatheter Aortic Valve Implantation: 12-month clinical outcomes.EuroIntervention. 2016;12(1):79-87.
